# Supplementary material for: Porous monodisperse V2O5 microspheres as cathode materials for lithium-ion batteries
Source: Royal Society of Chemistry journal article supplement (doi:10.1039/c0jm04398b), 2011-01-01
Supplement: c0jm04398b.pdf [file c0jm04398b.pdf]

*Supporting Information*

**Porous monodisperse V<sub>2</sub>O<sub>5</sub> microspheres as cathode materials for lithium-ion batteries**

Suqing Wang,<sup>†‡</sup> Zhenda Lu,<sup>†</sup> Da Wang,<sup>‡</sup> Chunguang Li,<sup>†</sup> Chunhua Chen<sup>\*‡</sup> and Yadong Yin<sup>\*†</sup>

<sup>†</sup>Department of Chemistry, University of California, Riverside, CA 92521, <sup>‡</sup>Department of Materials Science and Engineering, University of Science and Technology of China, Hefei, Anhui, China, 230026

\*To whom correspondence should be addressed. Emails: [cchchen@ustc.edu.cn](mailto:cchchen@ustc.edu.cn) (C.C.); [yadong.yin@ucr.edu](mailto:yadong.yin@ucr.edu) (Y.Y.)

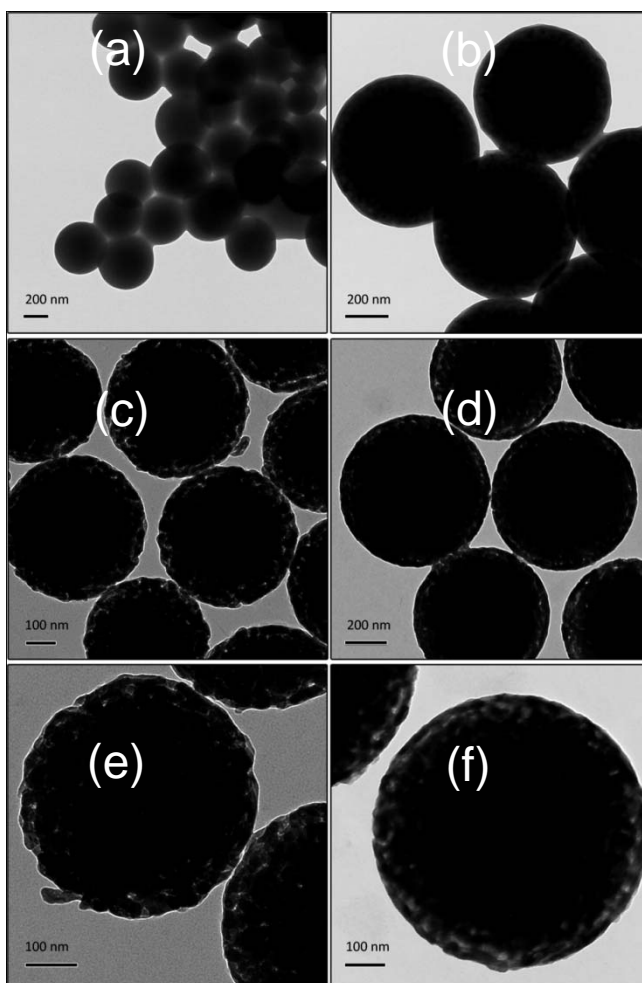

**Figure S1.** TEM images of VOPs precursor with size of (a) 450 nm, (b) 700 nm; (c, d) their corresponding V<sub>2</sub>O<sub>3</sub> phases obtained after hydrogen treatment; and their corresponding V<sub>2</sub>O<sub>5</sub> phases obtained after oxidation (e, f).

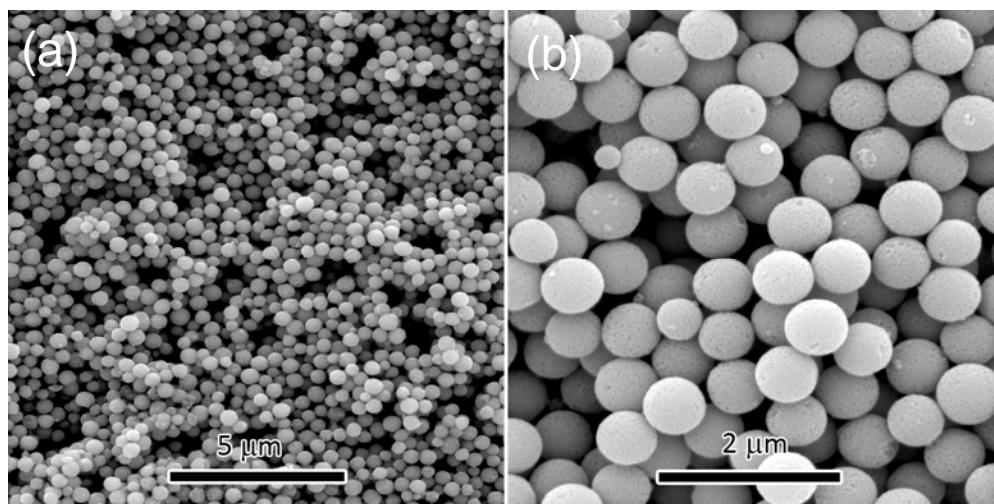

**Figure S2.** SEM images of the  $V_2O_5$  porous spheres with particle size of  $\sim 450$  nm (a), and  $\sim 700$  nm (b).

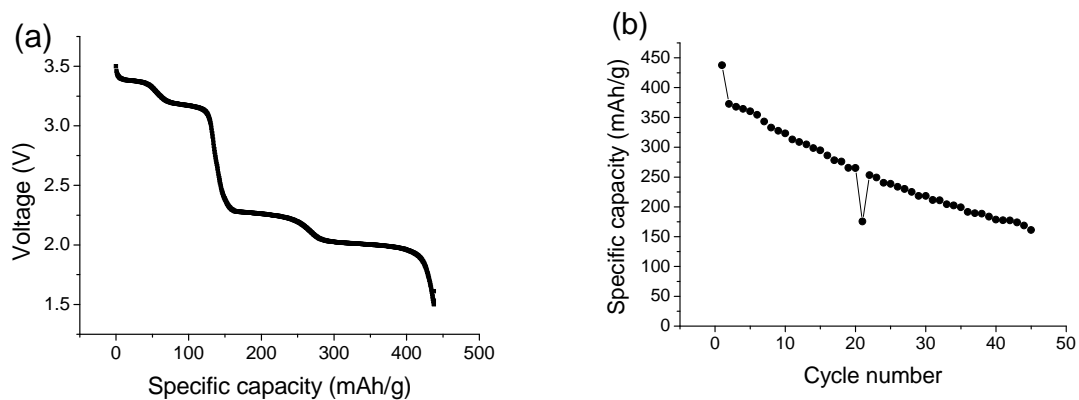

**Figure S3.** Galvanostatic cycling results of monodisperse porous  $V_2O_5$  microspheres in the range of 1.5-4.0 V: (a) first discharge curve at the voltage range of 1.5-4.0 V, (b) cycling performance.

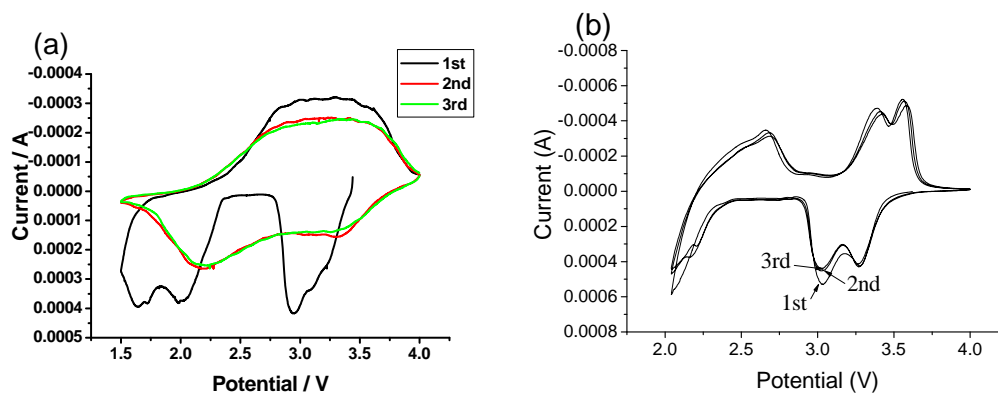

**Figure S4** CV curves (first three cycles) of monodisperse porous  $\text{V}_2\text{O}_5$  microspheres in the voltage range of 1.5-4.0 V (a), 2.05-4.0 V (b).
